# Supplementary material
Source: ML conference proceedings conference paper supplement (https://openreview.net/forum?id=b6H64u6TqI)

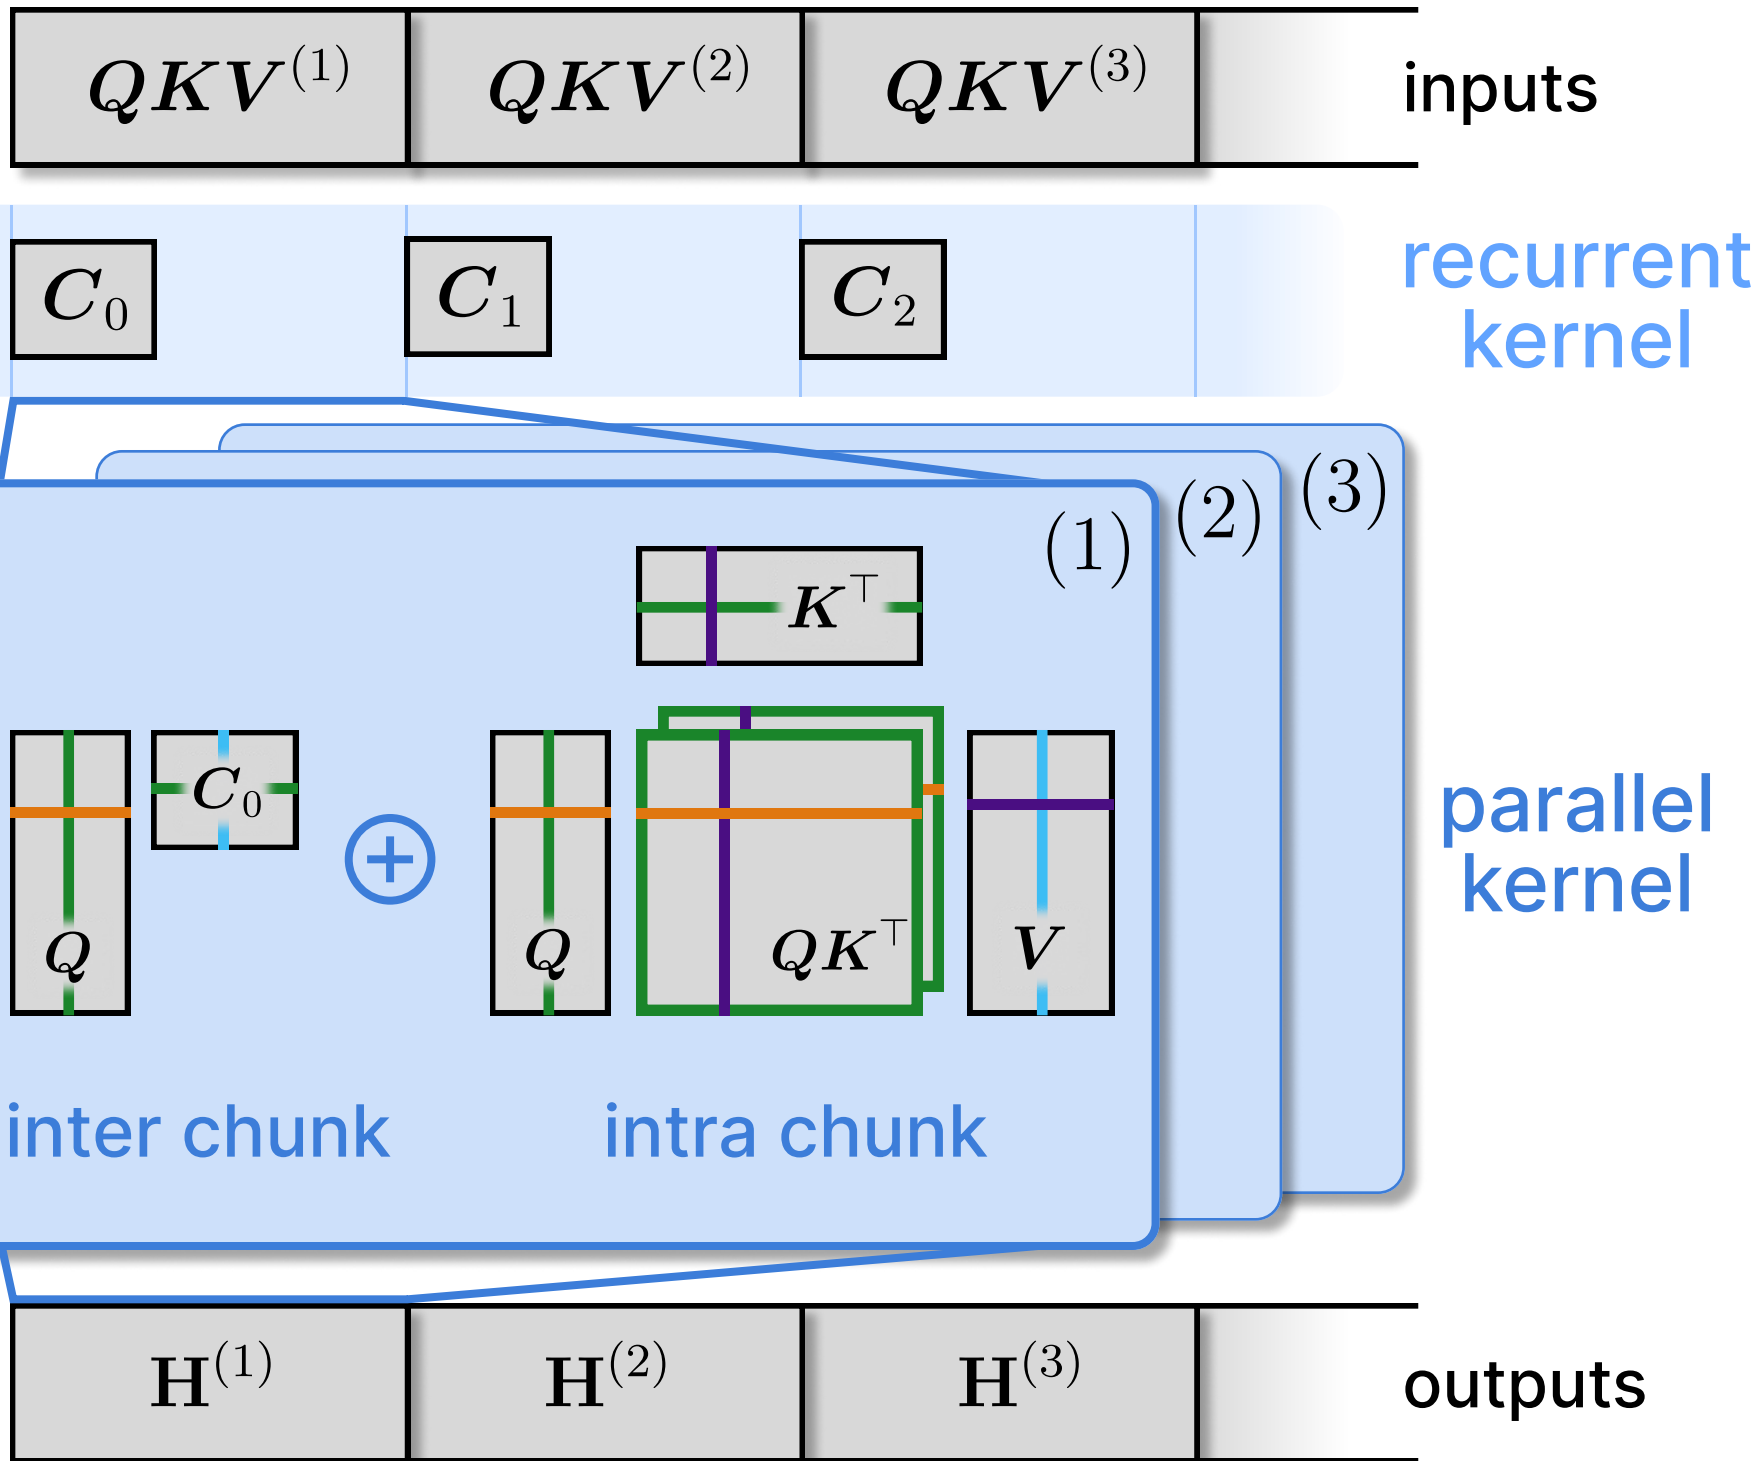

Supplement: supplementary_material [file Figure_1-7.pdf › mlstm_kernels_neurips25_suppl/res/Figure_1-7.pdf]
